# Supplementary material
Source: PubMed Central journal article supplement (PMC2651681)
Supplement: NIHMS94474-supplement-suppl_tables.pdf [file NIHMS94474-supplement-suppl_tables.pdf]

# PROTEOMICS

**Supporting Information  
for Proteomics**

**DOI 10.1002/pmic.200400922**

Yi Zhang, Tiansong Wang, Weibin Chen, Özlem Yilmaz, Yoonsuk Park,  
Il-Young Jung, Murray Hackett and Richard J. Lamont

**Differential protein expression by *Porphyromonas gingivalis* in response  
to secreted epithelial cell components**

Table S1A (supplementary material)

Detected and Differentially Expressed *P. gingivalis* Proteins Arranged by Functional Group.

| ORF     | Group | Sample    | KGM/cKGM |
|---------|-------|-----------|----------|
| PG0571, | A     | KGM-only  |          |
| PG0653, | A     | common    |          |
| PG0978, | A     | KGM-only  |          |
| PG1247, | A     | KGM-only  |          |
| PG1271, | A     | common    | 0.711    |
| PG1290, | A     | common    | 0.910    |
| PG1314, | A     | common    |          |
| PG2188, | A     | common    | *2       |
| PG1278, | A,B   | common    |          |
| PG0042, | A,E   | common    | 0.610    |
| PG0012, | B     | common    | 0.890    |
| PG0127, | B     | cKGM-only |          |
| PG0202, | B     | common    |          |
| PG0211, | B     | cKGM-only |          |
| PG0213, | B     | KGM-only  |          |
| PG0446, | B     | KGM-only  |          |
| PG0475, | B     | cKGM-only |          |
| PG0481, | B     | common    | 0.296    |
| PG0531, | B     | common    |          |
| PG0588, | B     | cKGM-only |          |
| PG0599, | B     | common    |          |
| PG0625, | B     | cKGM-only |          |
| PG0630, | B     | common    |          |
| PG0637, | B     | cKGM-only |          |
| PG0733, | B     | common    |          |
| PG0957, | B     | KGM-only  |          |
| PG0977, | B     | KGM-only  |          |
| PG1023, | B     | cKGM-only |          |
| PG1114, | B     | common    |          |
| PG1116, | B     | common    | 0.287    |
| PG1159, | B     | common    | *2       |
| PG1163, | B     | KGM-only  |          |
| PG1195, | B     | cKGM-only |          |
| PG1364, | B     | cKGM-only |          |
| PG1434, | B     | common    |          |
| PG1541, | B     | cKGM-only |          |
| PG1576, | B     | common    |          |
| PG1577, | B     | cKGM-only |          |
| PG1578, | B     | common    |          |
| PG1780, | B     | common    |          |

---

|                   |     |           |    |
|-------------------|-----|-----------|----|
| PG2067,           | B   | KGM-only  |    |
| PG2108,           | B   | KGM-only  |    |
| PG2109,           | B   | cKGM-only |    |
| PG2159,           | B   | KGM-only  |    |
| PG2187,           | B   | KGM-only  |    |
| PG2205,           | B   | common    |    |
| PG2217,           | B   | common    |    |
| PG0309,           | B,C | common    |    |
| PG1998,           | B,E | KGM-only  |    |
| P13793 FMA_PORGI, | C   | KGM-only  |    |
| PG0003,           | C   | cKGM-only |    |
| PG0011,           | C   | common    |    |
| PG0032,           | C   | common    |    |
| PG0043,           | C   | common    |    |
| PG0070,           | C   | common    |    |
| PG0071,           | C   | common    |    |
| PG0072,           | C   | KGM-only  |    |
| PG0076,           | C   | cKGM-only |    |
| PG0110,           | C   | cKGM-only |    |
| PG0118,           | C   | KGM-only  |    |
| PG0119,           | C   | cKGM-only |    |
| PG0120,           | C   | cKGM-only |    |
| PG0139,           | C   | KGM-only  |    |
| PG0178,           | C   | common    |    |
| PG0186,           | C   | cKGM-only |    |
| PG0191,           | C   | common    |    |
| PG0192,           | C   | common    |    |
| PG0264,           | C   | common    |    |
| PG0294,           | C   | cKGM-only |    |
| PG0305,           | C   | common    | *2 |
| PG0333,           | C   | KGM-only  |    |
| PG0334,           | C   | common    |    |
| PG0369,           | C   | cKGM-only |    |
| PG0490,           | C   | KGM-only  |    |
| PG0526,           | C   | common    |    |
| PG0576,           | C   | cKGM-only |    |
| PG0577,           | C   | KGM-only  |    |
| PG0580,           | C   | cKGM-only |    |
| PG0581,           | C   | cKGM-only |    |
| PG0705,           | C   | common    |    |
| PG0729,           | C   | cKGM-only |    |
| PG0750,           | C   | cKGM-only |    |
| PG0794,           | C   | cKGM-only |    |
| PG0906,           | C   | common    |    |
| PG0920,           | C   | KGM-only  |    |
| PG0922,           | C   | KGM-only  |    |
| PG1039,           | C   | KGM-only  |    |

---

---

|         |     |           |       |
|---------|-----|-----------|-------|
| PG1048, | C   | common    |       |
| PG1135, | C   | common    |       |
| PG1140, | C   | cKGM-only |       |
| PG1143, | C   | common    | *1    |
| PG1180, | C   | KGM-only  |       |
| PG1184, | C   | cKGM-only |       |
| PG1252, | C   | KGM-only  |       |
| PG1277, | C   | common    |       |
| PG1288, | C   | KGM-only  |       |
| PG1289, | C   | common    |       |
| PG1335, | C   | KGM-only  |       |
| PG1342, | C   | KGM-only  |       |
| PG1366, | C   | common    |       |
| PG1393, | C   | KGM-only  |       |
| PG1396, | C   | cKGM-only |       |
| PG1422, | C   | KGM-only  |       |
| PG1563, | C   | KGM-only  |       |
| PG1565, | C   | KGM-only  |       |
| PG1572, | C   | KGM-only  |       |
| PG1682, | C   | KGM-only  |       |
| PG1711, | C   | cKGM-only |       |
| PG1712, | C   | common    |       |
| PG1743, | C   | common    |       |
| PG1815, | C   | cKGM-only |       |
| PG1880, | C   | KGM-only  |       |
| PG1884, | C   | KGM-only  |       |
| PG1950, | C   | cKGM-only |       |
| PG1964, | C   | common    |       |
| PG2038, | C   | KGM-only  |       |
| PG2054, | C   | common    |       |
| PG2068, | C   | cKGM-only |       |
| PG2132, | C   | KGM-only  |       |
| PG2133, | C   | cKGM-only |       |
| PG2162, | C   | common    |       |
| PG2173, | C   | cKGM-only |       |
| PG2215, | C   | common    | *1    |
| PG2223, | C   | KGM-only  |       |
| PG1759, | C,D | cKGM-only |       |
| PG1094, | C,H | common    | *2    |
| PG2010, | C,H | common    |       |
| PG1954, | C,T | common    |       |
| PG2119, | C,T | cKGM-only |       |
| PG0047, | D   | common    |       |
| PG0079, | D   | common    |       |
| PG0090, | D   | common    | 1.200 |
| PG0141, | D   | cKGM-only |       |
| PG0245, | D   | common    |       |

---

---

|         |     |           |       |
|---------|-----|-----------|-------|
| PG0272, | D   | KGM-only  |       |
| PG0295, | D   | common    |       |
| PG0411, | D   | common    |       |
| PG0583, | D   | common    |       |
| PG0584, | D   | KGM-only  |       |
| PG0618, | D   | common    |       |
| PG1326, | D   | KGM-only  |       |
| PG1330, | D   | cKGM-only |       |
| PG1407, | D   | KGM-only  |       |
| PG1424, | D   | common    | 0.738 |
| PG1536, | D   | KGM-only  |       |
| PG1545, | D   | common    |       |
| PG1582, | D   | cKGM-only |       |
| PG1583, | D   | cKGM-only |       |
| PG1586, | D   | KGM-only  |       |
| PG1648, | D   | cKGM-only |       |
| PG1729, | D   | common    |       |
| PG1808, | D   | KGM-only  |       |
| PG2163, | D   | KGM-only  |       |
| PG0503, | D,M | common    | *2    |
| PG1844, | D,M | common    |       |
| PG2024, | D,M | common    | 0.654 |
| PG0135, | D,N | common    |       |
| PG0540, | D,S | cKGM-only |       |
| PG1323, | D,T | common    |       |
| PG0126, | E   | cKGM-only |       |
| PG0152, | E   | KGM-only  |       |
| PG0344, | E   | KGM-only  |       |
| PG0559, | E   | cKGM-only |       |
| PG0784, | E   | common    |       |
| PG0803, | E   | cKGM-only |       |
| PG0890, | E   | cKGM-only |       |
| PG1013, | E   | common    | 0.698 |
| PG1285, | E   | cKGM-only |       |
| PG1321, | E   | common    |       |
| PG1816, | E   | common    | 0.802 |
| PG1885, | E   | common    |       |
| PG1896, | E   | common    |       |
| PG0035, | F   | common    |       |
| PG0095, | F   | common    | *2    |
| PG0121, | F   | common    | *2    |
| PG0227, | F   | KGM-only  |       |
| PG0237, | F   | KGM-only  |       |
| PG0269, | F   | cKGM-only |       |
| PG0330, | F   | common    |       |
| PG0368, | F   | common    | *2    |
| PG0384, | F   | KGM-only  |       |

---

---

|         |     |           |       |
|---------|-----|-----------|-------|
| PG0398, | F   | common    |       |
| PG0416, | F   | common    |       |
| PG0488, | F   | KGM-only  |       |
| PG0754, | F   | cKGM-only |       |
| PG0864, | F   | cKGM-only |       |
| PG0881, | F   | common    |       |
| PG0908, | F   | common    |       |
| PG1036, | F   | common    |       |
| PG1038, | F   | common    |       |
| PG1128, | F   | KGM-only  |       |
| PG1242, | F   | KGM-only  |       |
| PG1253, | F   | cKGM-only |       |
| PG1258, | F   | cKGM-only |       |
| PG1338, | F   | KGM-only  |       |
| PG1386, | F   | common    |       |
| PG1389, | F   | common    |       |
| PG1418, | F   | common    |       |
| PG1469, | F   | common    |       |
| PG1495, | F   | cKGM-only |       |
| PG1533, | F   | common    |       |
| PG1622, | F   | common    |       |
| PG1697, | F   | cKGM-only |       |
| PG1702, | F   | common    |       |
| PG1772, | F   | KGM-only  |       |
| PG1774, | F   | common    |       |
| PG1794, | F   | cKGM-only |       |
| PG1814, | F   | common    |       |
| PG1831, | F   | KGM-only  |       |
| PG1849, | F   | common    |       |
| PG1853, | F   | common    | 0.918 |
| PG1993, | F   | cKGM-only |       |
| PG2210, | F   | common    |       |
| PG0386, | F,N | common    |       |
| PG1531, | G,L | cKGM-only |       |
| PG0025, | H   | cKGM-only |       |
| PG0034, | H   | common    | 0.391 |
| PG0130, | H   | common    | 0.577 |
| PG0163, | H   | common    |       |
| PG0195, | H   | common    | 0.775 |
| PG0230, | H   | common    | 0.821 |
| PG0249, | H   | common    | 1.083 |
| PG0275, | H   | common    |       |
| PG0279, | H   | common    |       |
| PG0304, | H   | common    |       |
| PG0307, | H   | cKGM-only |       |
| PG0324, | H   | common    |       |
| PG0328, | H   | common    |       |

---

---

|         |   |           |       |
|---------|---|-----------|-------|
| PG0343, | H | common    |       |
| PG0347, | H | KGM-only  |       |
| PG0429, | H | common    |       |
| PG0474, | H | KGM-only  |       |
| PG0548, | H | common    | 1.475 |
| PG0616, | H | common    | 0.546 |
| PG0623, | H | common    |       |
| PG0665, | H | common    |       |
| PG0674, | H | common    |       |
| PG0675, | H | common    |       |
| PG0687, | H | common    | 1.165 |
| PG0689, | H | common    |       |
| PG0690, | H | common    |       |
| PG0692, | H | common    | 1.039 |
| PG0699, | H | common    |       |
| PG0745, | H | cKGM-only |       |
| PG0776, | H | common    |       |
| PG0777, | H | common    |       |
| PG0793, | H | common    |       |
| PG0802, | H | common    |       |
| PG0804, | H | common    |       |
| PG0950, | H | common    | *2    |
| PG1017, | H | common    | 1.245 |
| PG1042, | H | cKGM-only |       |
| PG1066, | H | common    |       |
| PG1069, | H | common    | 1.062 |
| PG1070, | H | common    |       |
| PG1073, | H | KGM-only  |       |
| PG1074, | H | KGM-only  |       |
| PG1077, | H | common    |       |
| PG1078, | H | common    | 0.754 |
| PG1081, | H | common    |       |
| PG1082, | H | common    | 0.564 |
| PG1084, | H | common    | 1.457 |
| PG1134, | H | common    |       |
| PG1151, | H | common    |       |
| PG1172, | H | common    |       |
| PG1232, | H | common    | 0.650 |
| PG1269, | H | common    |       |
| PG1305, | H | common    | 0.970 |
| PG1331, | H | common    | 0.847 |
| PG1332, | H | common    | *1    |
| PG1368, | H | common    |       |
| PG1369, | H | KGM-only  |       |
| PG1401, | H | common    |       |
| PG1417, | H | common    |       |
| PG1421, | H | KGM-only  |       |

---

---

|         |     |           |       |
|---------|-----|-----------|-------|
| PG1559, | H   | common    |       |
| PG1608, | H   | KGM-only  |       |
| PG1609, | H   | common    |       |
| PG1612, | H   | common    |       |
| PG1615, | H   | common    |       |
| PG1633, | H   | common    |       |
| PG1656, | H   | common    | *2    |
| PG1657, | H   | common    |       |
| PG1676, | H   | common    | 0.944 |
| PG1677, | H   | common    | 0.565 |
| PG1741, | H   | common    |       |
| PG1748, | H   | common    | *2    |
| PG1755, | H   | common    | 1.162 |
| PG1793, | H   | common    |       |
| PG1809, | H   | common    |       |
| PG1810, | H   | common    | 0.498 |
| PG1812, | H   | common    | 0.828 |
| PG1813, | H   | common    |       |
| PG1824, | H   | common    |       |
| PG1858, | H   | cKGM-only |       |
| PG1872, | H   | common    | 1.286 |
| PG1949, | H   | common    | 0.938 |
| PG1956, | H   | common    |       |
| PG2042, | H   | common    | *1    |
| PG2121, | H   | KGM-only  |       |
| PG2124, | H   | common    | 1.415 |
| PG2177, | H   | KGM-only  |       |
| PG2181, | H   | common    |       |
| PG2182, | H   | common    |       |
| PG1592, | H,J | cKGM-only |       |
| PG1996, | H,O | common    |       |
| PG1801, | H,S | cKGM-only |       |
| PG1803, | H,S | common    |       |
| PG1804, | H,S | common    | 0.463 |
| PG1805, | H,S | cKGM-only |       |
| PG1806, | H,S | common    | *1    |
| PG0329, | H,T | common    | 0.530 |
| PG0138, | I   | common    | 0.203 |
| PG0775, | I   | common    | 1.002 |
| PG1076, | I   | common    | 1.312 |
| PG1079, | I   | KGM-only  |       |
| PG1080, | I   | common    | *2    |
| PG1239, | I   | common    |       |
| PG1249, | I   | cKGM-only |       |
| PG1416, | I   | common    |       |
| PG1764, | I   | common    |       |
| PG1765, | I   | common    |       |

---



---

|         |   |           |       |
|---------|---|-----------|-------|
| PG2141, | I | common    |       |
| PG0048, | J | common    |       |
| PG0055, | J | KGM-only  |       |
| PG0097, | J | common    |       |
| PG0112, | J | common    |       |
| PG0124, | J | cKGM-only |       |
| PG0128, | J | cKGM-only |       |
| PG0144, | J | cKGM-only |       |
| PG0160, | J | common    |       |
| PG0174, | J | common    |       |
| PG0242, | J | KGM-only  |       |
| PG0257, | J | cKGM-only |       |
| PG0259, | J | common    |       |
| PG0276, | J | cKGM-only |       |
| PG0306, | J | common    |       |
| PG0317, | J | common    | *2    |
| PG0323, | J | common    |       |
| PG0325, | J | common    |       |
| PG0361, | J | KGM-only  |       |
| PG0364, | J | cKGM-only |       |
| PG0447, | J | common    |       |
| PG0453, | J | KGM-only  |       |
| PG0491, | J | common    | 0.805 |
| PG0501, | J | KGM-only  |       |
| PG0516, | J | common    |       |
| PG0532, | J | cKGM-only |       |
| PG0535, | J | common    |       |
| PG0547, | J | common    |       |
| PG0573, | J | KGM-only  |       |
| PG0621, | J | KGM-only  |       |
| PG0629, | J | cKGM-only |       |
| PG0645, | J | cKGM-only |       |
| PG0659, | J | KGM-only  |       |
| PG0670, | J | cKGM-only |       |
| PG0677, | J | common    | *2    |
| PG0680, | J | cKGM-only |       |
| PG0686, | J | common    |       |
| PG0718, | J | KGM-only  |       |
| PG0778, | J | cKGM-only |       |
| PG0800, | J | common    | *2    |
| PG0847, | J | KGM-only  |       |
| PG0909, | J | cKGM-only |       |
| PG0972, | J | KGM-only  |       |
| PG1049, | J | KGM-only  |       |
| PG1068, | J | common    | 0.538 |
| PG1087, | J | cKGM-only |       |
| PG1111, | J | cKGM-only |       |

---

---

|         |   |           |       |
|---------|---|-----------|-------|
| PG1179, | J | KGM-only  |       |
| PG1248, | J | common    |       |
| PG1270, | J | common    |       |
| PG1280, | J | common    | 0.857 |
| PG1283, | J | common    | 0.974 |
| PG1311, | J | KGM-only  |       |
| PG1313, | J | KGM-only  |       |
| PG1362, | J | common    | *2    |
| PG1363, | J | cKGM-only |       |
| PG1471, | J | cKGM-only |       |
| PG1489, | J | KGM-only  |       |
| PG1505, | J | cKGM-only |       |
| PG1528, | J | KGM-only  |       |
| PG1530, | J | KGM-only  |       |
| PG1588, | J | common    |       |
| PG1591, | J | common    |       |
| PG1618, | J | cKGM-only |       |
| PG1653, | J | common    |       |
| PG1683, | J | cKGM-only |       |
| PG1720, | J | common    |       |
| PG1739, | J | common    |       |
| PG1754, | J | common    |       |
| PG1778, | J | KGM-only  |       |
| PG1860, | J | common    | *1    |
| PG1876, | J | common    |       |
| PG1903, | J | common    |       |
| PG1994, | J | KGM-only  |       |
| PG2004, | J | KGM-only  |       |
| PG2014, | J | cKGM-only |       |
| PG2021, | J | common    |       |
| PG2043, | J | common    |       |
| PG2044, | J | common    | *1    |
| PG2078, | J | cKGM-only |       |
| PG2094, | J | common    | *1    |
| PG2126, | J | cKGM-only |       |
| PG2158, | J | cKGM-only |       |
| PG2197, | J | cKGM-only |       |
| PG2207, | J | common    | 1.114 |
| PG2209, | J | cKGM-only |       |
| PG2221, | J | KGM-only  |       |
| PG0018, | K | cKGM-only |       |
| PG0026, | K | cKGM-only |       |
| PG0027, | K | KGM-only  |       |
| PG0056, | K | common    |       |
| PG0078, | K | KGM-only  |       |
| PG0081, | K | KGM-only  |       |
| PG0082, | K | cKGM-only |       |

---

---

|         |   |           |    |
|---------|---|-----------|----|
| PG0089, | K | KGM-only  |    |
| PG0098, | K | KGM-only  |    |
| PG0109, | K | KGM-only  |    |
| PG0125, | K | cKGM-only |    |
| PG0133, | K | KGM-only  |    |
| PG0136, | K | cKGM-only |    |
| PG0140, | K | cKGM-only |    |
| PG0146, | K | cKGM-only |    |
| PG0179, | K | common    |    |
| PG0180, | K | KGM-only  |    |
| PG0188, | K | cKGM-only |    |
| PG0189, | K | common    | *2 |
| PG0203, | K | KGM-only  |    |
| PG0215, | K | KGM-only  |    |
| PG0218, | K | KGM-only  |    |
| PG0241, | K | common    |    |
| PG0246, | K | cKGM-only |    |
| PG0256, | K | KGM-only  |    |
| PG0285, | K | KGM-only  |    |
| PG0289, | K | KGM-only  |    |
| PG0319, | K | cKGM-only |    |
| PG0320, | K | cKGM-only |    |
| PG0327, | K | cKGM-only |    |
| PG0336, | K | KGM-only  |    |
| PG0338, | K | common    |    |
| PG0363, | K | common    |    |
| PG0366, | K | common    |    |
| PG0373, | K | cKGM-only |    |
| PG0409, | K | common    |    |
| PG0410, | K | cKGM-only |    |
| PG0423, | K | common    |    |
| PG0434, | K | cKGM-only |    |
| PG0438, | K | KGM-only  |    |
| PG0448, | K | common    | *1 |
| PG0452, | K | common    |    |
| PG0467, | K | KGM-only  |    |
| PG0471, | K | common    |    |
| PG0482, | K | common    |    |
| PG0492, | K | KGM-only  |    |
| PG0495, | K | KGM-only  |    |
| PG0517, | K | KGM-only  |    |
| PG0534, | K | KGM-only  |    |
| PG0557, | K | KGM-only  |    |
| PG0602, | K | KGM-only  |    |
| PG0605, | K | KGM-only  |    |
| PG0611, | K | KGM-only  |    |
| PG0613, | K | common    |    |

---

---

|         |   |           |       |
|---------|---|-----------|-------|
| PG0622, | K | common    | *1    |
| PG0626, | K | KGM-only  |       |
| PG0652, | K | common    |       |
| PG0654, | K | KGM-only  |       |
| PG0698, | K | KGM-only  |       |
| PG0726, | K | common    |       |
| PG0757, | K | common    |       |
| PG0774, | K | KGM-only  |       |
| PG0779, | K | KGM-only  |       |
| PG0780, | K | common    |       |
| PG0781, | K | common    | *2    |
| PG0787, | K | cKGM-only |       |
| PG0809, | K | KGM-only  |       |
| PG0832, | K | cKGM-only |       |
| PG0834, | K | cKGM-only |       |
| PG0840, | K | common    |       |
| PG0843, | K | common    |       |
| PG0844, | K | KGM-only  |       |
| PG0854, | K | cKGM-only |       |
| PG0856, | K | common    |       |
| PG0866, | K | cKGM-only |       |
| PG0871, | K | common    |       |
| PG0877, | K | KGM-only  |       |
| PG0884, | K | KGM-only  |       |
| PG0895, | K | common    |       |
| PG0913, | K | cKGM-only |       |
| PG0914, | K | KGM-only  |       |
| PG0918, | K | KGM-only  |       |
| PG0931, | K | KGM-only  |       |
| PG0980, | K | cKGM-only |       |
| PG0987, | K | KGM-only  |       |
| PG1006, | K | common    |       |
| PG1020, | K | KGM-only  |       |
| PG1022, | K | common    |       |
| PG1026, | K | cKGM-only |       |
| PG1035, | K | common    |       |
| PG1037, | K | common    | 0.691 |
| PG1051, | K | KGM-only  |       |
| PG1067, | K | KGM-only  |       |
| PG1071, | K | common    |       |
| PG1085, | K | common    |       |
| PG1093, | K | common    |       |
| PG1096, | K | common    | *1    |
| PG1100, | K | KGM-only  |       |
| PG1102, | K | KGM-only  |       |
| PG1107, | K | KGM-only  |       |
| PG1146, | K | common    |       |

---

---

|         |   |           |       |
|---------|---|-----------|-------|
| PG1164, | K | cKGM-only |       |
| PG1185, | K | KGM-only  |       |
| PG1186, | K | KGM-only  |       |
| PG1189, | K | common    |       |
| PG1192, | K | cKGM-only |       |
| PG1199, | K | cKGM-only |       |
| PG1202, | K | common    |       |
| PG1209, | K | common    |       |
| PG1218, | K | KGM-only  |       |
| PG1219, | K | common    |       |
| PG1281, | K | cKGM-only |       |
| PG1302, | K | common    |       |
| PG1308, | K | common    |       |
| PG1316, | K | KGM-only  |       |
| PG1317, | K | KGM-only  |       |
| PG1341, | K | common    |       |
| PG1351, | K | KGM-only  |       |
| PG1356, | K | common    | 0.701 |
| PG1367, | K | cKGM-only |       |
| PG1382, | K | KGM-only  |       |
| PG1394, | K | cKGM-only |       |
| PG1405, | K | KGM-only  |       |
| PG1409, | K | KGM-only  |       |
| PG1410, | K | cKGM-only |       |
| PG1414, | K | common    | *2    |
| PG1439, | K | common    |       |
| PG1440, | K | cKGM-only |       |
| PG1492, | K | KGM-only  |       |
| PG1493, | K | common    |       |
| PG1499, | K | KGM-only  |       |
| PG1519, | K | KGM-only  |       |
| PG1529, | K | common    |       |
| PG1554, | K | KGM-only  |       |
| PG1581, | K | KGM-only  |       |
| PG1599, | K | cKGM-only |       |
| PG1611, | K | common    |       |
| PG1621, | K | cKGM-only |       |
| PG1626, | K | KGM-only  |       |
| PG1652, | K | common    |       |
| PG1675, | K | common    | *2    |
| PG1679, | K | KGM-only  |       |
| PG1715, | K | common    |       |
| PG1782, | K | KGM-only  |       |
| PG1786, | K | KGM-only  |       |
| PG1790, | K | cKGM-only |       |
| PG1795, | K | cKGM-only |       |
| PG1802, | K | cKGM-only |       |

---

---

|         |   |           |       |
|---------|---|-----------|-------|
| PG1819, | K | KGM-only  |       |
| PG1823, | K | KGM-only  |       |
| PG1835, | K | common    |       |
| PG1850, | K | cKGM-only |       |
| PG1871, | K | KGM-only  |       |
| PG1881, | K | cKGM-only |       |
| PG1891, | K | KGM-only  |       |
| PG1948, | K | common    |       |
| PG1974, | K | cKGM-only |       |
| PG1986, | K | cKGM-only |       |
| PG1987, | K | common    |       |
| PG1988, | K | cKGM-only |       |
| PG2006, | K | KGM-only  |       |
| PG2017, | K | KGM-only  |       |
| PG2019, | K | KGM-only  |       |
| PG2020, | K | common    |       |
| PG2022, | K | cKGM-only |       |
| PG2029, | K | common    | 2.120 |
| PG2040, | K | KGM-only  |       |
| PG2049, | K | KGM-only  |       |
| PG2050, | K | common    |       |
| PG2063, | K | common    |       |
| PG2064, | K | cKGM-only |       |
| PG2066, | K | common    |       |
| PG2083, | K | cKGM-only |       |
| PG2086, | K | common    |       |
| PG2089, | K | cKGM-only |       |
| PG2092, | K | common    |       |
| PG2105, | K | cKGM-only |       |
| PG2106, | K | common    |       |
| PG2136, | K | cKGM-only |       |
| PG2144, | K | common    |       |
| PG2149, | K | common    |       |
| PG2155, | K | common    |       |
| PG2172, | K | cKGM-only |       |
| PG2174, | K | common    |       |
| PG2204, | K | common    |       |
| PG2208, | K | KGM-only  |       |
| PG2212, | K | KGM-only  |       |
| PG2216, | K | KGM-only  |       |
| PG2227, | K | KGM-only  |       |
| PG0461, | L | common    |       |
| PG0838, | L | KGM-only  |       |
| PG0841, | L | KGM-only  |       |
| PG0842, | L | KGM-only  |       |
| PG0874, | L | cKGM-only |       |
| PG1476, | L | KGM-only  |       |

---

|         |   |           |       |
|---------|---|-----------|-------|
| PG1478, | L | common    | *1    |
| PG1479, | L | common    |       |
| PG1486, | L | cKGM-only |       |
| PG1490, | L | KGM-only  |       |
| PG0010, | M | cKGM-only |       |
| PG0045, | M | cKGM-only |       |
| PG0137, | M | common    |       |
| PG0159, | M | common    | 0.590 |
| PG0196, | M | common    |       |
| PG0232, | M | common    | 1.865 |
| PG0235, | M | common    |       |
| PG0293, | M | common    |       |
| PG0383, | M | cKGM-only |       |
| PG0415, | M | common    |       |
| PG0417, | M | cKGM-only |       |
| PG0418, | M | cKGM-only |       |
| PG0445, | M | common    |       |
| PG0485, | M | common    |       |
| PG0506, | M | common    | *1    |
| PG0514, | M | common    |       |
| PG0520, | M | common    | 0.990 |
| PG0521, | M | common    | 0.570 |
| PG0537, | M | common    | 1.101 |
| PG0553, | M | common    |       |
| PG0561, | M | common    |       |
| PG0620, | M | common    |       |
| PG0639, | M | cKGM-only |       |
| PG0708, | M | cKGM-only |       |
| PG0710, | M | KGM-only  |       |
| PG0724, | M | common    |       |
| PG0753, | M | common    | *1    |
| PG0758, | M | common    |       |
| PG0762, | M | common    |       |
| PG0805, | M | common    |       |
| PG0889, | M | KGM-only  |       |
| PG1004, | M | common    |       |
| PG1055, | M | KGM-only  |       |
| PG1060, | M | KGM-only  |       |
| PG1115, | M | common    |       |
| PG1118, | M | common    | 0.982 |
| PG1208, | M | common    |       |
| PG1210, | M | common    | 0.826 |
| PG1315, | M | common    |       |
| PG1343, | M | KGM-only  |       |
| PG1361, | M | common    |       |
| PG1427, | M | KGM-only  |       |
| PG1542, | M | KGM-only  |       |

---

|         |   |           |       |
|---------|---|-----------|-------|
| PG1548, | M | KGM-only  |       |
| PG1598, | M | KGM-only  |       |
| PG1601, | M | KGM-only  |       |
| PG1605, | M | common    | *2    |
| PG1701, | M | cKGM-only |       |
| PG1704, | M | common    |       |
| PG1762, | M | common    | 0.910 |
| PG1775, | M | cKGM-only |       |
| PG1776, | M | KGM-only  |       |
| PG1788, | M | common    | 0.938 |
| PG1789, | M | KGM-only  |       |
| PG1917, | M | cKGM-only |       |
| PG1918, | M | common    |       |
| PG2000, | M | KGM-only  |       |
| PG2001, | M | cKGM-only |       |
| PG2201, | M | KGM-only  |       |
| PG0037, | N | common    |       |
| PG0099, | N | common    |       |
| PG0153, | N | common    |       |
| PG0165, | N | cKGM-only |       |
| PG0167, | N | common    | 0.862 |
| PG0170, | N | common    |       |
| PG0255, | N | common    |       |
| PG0263, | N | KGM-only  |       |
| PG0267, | N | common    |       |
| PG0268, | N | cKGM-only |       |
| PG0316, | N | common    | 1.208 |
| PG0376, | N | common    |       |
| PG0377, | N | common    | 0.660 |
| PG0378, | N | common    | 0.799 |
| PG0387, | N | common    | 1.191 |
| PG0390, | N | common    |       |
| PG0391, | N | common    |       |
| PG0392, | N | common    | 1.092 |
| PG0393, | N | common    | 1.024 |
| PG0502, | N | cKGM-only |       |
| PG0522, | N | KGM-only  |       |
| PG0592, | N | common    |       |
| PG0595, | N | common    |       |
| PG0596, | N | common    |       |
| PG0597, | N | common    | 1.092 |
| PG0744, | N | cKGM-only |       |
| PG0755, | N | cKGM-only |       |
| PG0796, | N | common    |       |
| PG0933, | N | common    | *2    |
| PG0962, | N | common    |       |
| PG0969, | N | KGM-only  |       |

---



---

|         |   |           |       |
|---------|---|-----------|-------|
| PG0989, | N | common    |       |
| PG0992, | N | common    | 0.759 |
| PG1095, | N | common    |       |
| PG1121, | N | common    | 0.599 |
| PG1122, | N | cKGM-only |       |
| PG1132, | N | common    |       |
| PG1238, | N | cKGM-only |       |
| PG1246, | N | common    | 2.431 |
| PG1274, | N | KGM-only  |       |
| PG1297, | N | common    | 0.542 |
| PG1370, | N | common    |       |
| PG1540, | N | cKGM-only |       |
| PG1566, | N | common    |       |
| PG1596, | N | common    |       |
| PG1758, | N | common    | *1    |
| PG1771, | N | KGM-only  |       |
| PG1848, | N | common    |       |
| PG1878, | N | cKGM-only |       |
| PG1901, | N | common    |       |
| PG1912, | N | common    |       |
| PG1913, | N | common    |       |
| PG1919, | N | KGM-only  |       |
| PG1920, | N | cKGM-only |       |
| PG1921, | N | common    |       |
| PG1922, | N | common    |       |
| PG1923, | N | common    |       |
| PG1925, | N | KGM-only  |       |
| PG1926, | N | common    | 0.845 |
| PG1927, | N | common    |       |
| PG1928, | N | common    |       |
| PG1930, | N | KGM-only  |       |
| PG1931, | N | KGM-only  |       |
| PG1932, | N | common    |       |
| PG1933, | N | common    |       |
| PG1934, | N | KGM-only  |       |
| PG1935, | N | common    |       |
| PG1936, | N | common    |       |
| PG1937, | N | common    |       |
| PG1938, | N | common    |       |
| PG1939, | N | common    |       |
| PG1940, | N | common    | 1.296 |
| PG1941, | N | common    |       |
| PG1942, | N | KGM-only  |       |
| PG1951, | N | common    |       |
| PG2023, | N | cKGM-only |       |
| PG2062, | N | cKGM-only |       |
| PG2085, | N | cKGM-only |       |

---

---

|         |     |           |       |
|---------|-----|-----------|-------|
| PG2117, | N   | cKGM-only |       |
| PG2165, | N   | cKGM-only |       |
| PG0073, | O   | common    |       |
| PG0075, | O   | common    |       |
| PG0171, | O   | common    |       |
| PG0296, | O   | common    |       |
| PG0464, | O   | common    |       |
| PG0512, | O   | KGM-only  |       |
| PG0525, | O   | cKGM-only |       |
| PG0529, | O   | KGM-only  |       |
| PG0530, | O   | common    |       |
| PG0558, | O   | common    |       |
| PG0589, | O   | common    |       |
| PG0603, | O   | common    |       |
| PG0791, | O   | common    |       |
| PG0919, | O   | cKGM-only |       |
| PG0951, | O   | cKGM-only |       |
| PG0976, | O   | common    |       |
| PG1123, | O   | common    |       |
| PG1129, | O   | common    | 0.980 |
| PG1260, | O   | common    | 1.037 |
| PG1353, | O   | common    | 0.633 |
| PG1360, | O   | common    |       |
| PG1766, | O   | common    |       |
| PG1781, | O   | cKGM-only |       |
| PG2003, | O   | KGM-only  |       |
| PG2055, | O   | common    |       |
| PG2060, | O   | common    |       |
| PG2097, | O   | common    |       |
| PG0004, | P   | common    |       |
| PG0020, | P   | KGM-only  |       |
| PG0142, | P   | KGM-only  |       |
| PG0148, | P   | common    |       |
| PG0270, | P   | cKGM-only |       |
| PG0396, | P   | cKGM-only |       |
| PG1007, | P   | KGM-only  |       |
| PG1053, | P   | common    |       |
| PG1127, | P   | KGM-only  |       |
| PG1237, | P   | cKGM-only |       |
| PG1623, | P   | cKGM-only |       |
| PG1641, | P   | common    |       |
| PG2125, | P   | KGM-only  |       |
| PG2161, | P   | KGM-only  |       |
| PG0720, | P,Q | cKGM-only |       |
| PG0747, | P,Q | cKGM-only |       |
| PG1797, | P,Q | KGM-only  |       |
| PG0321, | P,S | common    |       |

---

---

|         |   |           |       |
|---------|---|-----------|-------|
| PG0017, | Q | cKGM-only |       |
| PG0719, | Q | cKGM-only |       |
| PG0928, | Q | common    | *1    |
| PG1432, | Q | cKGM-only |       |
| PG0086, | R | cKGM-only |       |
| PG0162, | R | cKGM-only |       |
| PG0201, | R | KGM-only  |       |
| PG0254, | R | common    |       |
| PG0332, | R | common    |       |
| PG0389, | R | common    |       |
| PG0394, | R | common    | 0.864 |
| PG0395, | R | common    |       |
| PG0766, | R | common    | 0.729 |
| PG0923, | R | KGM-only  |       |
| PG1105, | R | cKGM-only |       |
| PG1256, | R | cKGM-only |       |
| PG1365, | R | KGM-only  |       |
| PG1688, | R | common    | *1    |
| PG1847, | R | common    | *2    |
| PG1911, | R | common    |       |
| PG2016, | R | cKGM-only |       |
| PG0006, | S | cKGM-only |       |
| PG0063, | S | KGM-only  |       |
| PG0064, | S | common    |       |
| PG0091, | S | cKGM-only |       |
| PG0092, | S | common    |       |
| PG0094, | S | cKGM-only |       |
| PG0117, | S | cKGM-only |       |
| PG0258, | S | common    |       |
| PG0280, | S | KGM-only  |       |
| PG0281, | S | common    |       |
| PG0282, | S | KGM-only  |       |
| PG0292, | S | cKGM-only |       |
| PG0436, | S | KGM-only  |       |
| PG0462, | S | common    |       |
| PG0538, | S | KGM-only  |       |
| PG0562, | S | cKGM-only |       |
| PG0631, | S | common    |       |
| PG0632, | S | KGM-only  |       |
| PG0636, | S | common    |       |
| PG0644, | S | common    |       |
| PG0647, | S | common    |       |
| PG0668, | S | common    |       |
| PG0669, | S | cKGM-only |       |
| PG0671, | S | cKGM-only |       |
| PG0679, | S | KGM-only  |       |
| PG0682, | S | KGM-only  |       |

---

|         |   |           |       |
|---------|---|-----------|-------|
| PG0683, | S | common    | *2    |
| PG0684, | S | KGM-only  |       |
| PG0707, | S | common    | 0.638 |
| PG0714, | S | common    |       |
| PG0715, | S | KGM-only  |       |
| PG0782, | S | common    | 0.955 |
| PG0785, | S | cKGM-only |       |
| PG0938, | S | common    |       |
| PG0945, | S | KGM-only  |       |
| PG0946, | S | cKGM-only |       |
| PG1043, | S | KGM-only  |       |
| PG1101, | S | common    | *2    |
| PG1126, | S | cKGM-only |       |
| PG1175, | S | cKGM-only |       |
| PG1176, | S | common    | *2    |
| PG1225, | S | common    |       |
| PG1286, | S | common    | 0.497 |
| PG1294, | S | common    | *1    |
| PG1340, | S | KGM-only  |       |
| PG1379, | S | KGM-only  |       |
| PG1381, | S | KGM-only  |       |
| PG1408, | S | KGM-only  |       |
| PG1411, | S | common    |       |
| PG1551, | S | common    | *2    |
| PG1552, | S | KGM-only  |       |
| PG1606, | S | KGM-only  |       |
| PG1642, | S | KGM-only  |       |
| PG1719, | S | cKGM-only |       |
| PG1734, | S | KGM-only  |       |
| PG1760, | S | cKGM-only |       |
| PG1768, | S | KGM-only  |       |
| PG1792, | S | common    |       |
| PG1836, | S | KGM-only  |       |
| PG1899, | S | cKGM-only |       |
| PG1965, | S | common    |       |
| PG2090, | S | cKGM-only |       |
| PG2206, | S | cKGM-only |       |
| PG0024, | T | common    |       |
| PG0061, | T | cKGM-only |       |
| PG0062, | T | cKGM-only |       |
| PG0087, | T | KGM-only  |       |
| PG0181, | T | common    | *1    |
| PG0182, | T | common    | *1    |
| PG0185, | T | common    | 0.887 |
| PG0226, | T | common    | *1    |
| PG0228, | T | KGM-only  |       |
| PG0300, | T | KGM-only  |       |

---

|         |   |           |       |
|---------|---|-----------|-------|
| PG0349, | T | KGM-only  |       |
| PG0350, | T | cKGM-only |       |
| PG0359, | T | KGM-only  |       |
| PG0360, | T | common    |       |
| PG0401, | T | common    |       |
| PG0430, | T | common    | 1.157 |
| PG0432, | T | KGM-only  |       |
| PG0433, | T | common    |       |
| PG0443, | T | common    |       |
| PG0449, | T | common    |       |
| PG0456, | T | KGM-only  |       |
| PG0615, | T | common    |       |
| PG0634, | T | common    |       |
| PG0660, | T | KGM-only  |       |
| PG0676, | T | common    |       |
| PG0694, | T | common    | 1.561 |
| PG0695, | T | common    | 0.499 |
| PG0725, | T | common    |       |
| PG0742, | T | common    | *1    |
| PG0751, | T | KGM-only  |       |
| PG0759, | T | KGM-only  |       |
| PG0769, | T | KGM-only  |       |
| PG0861, | T | cKGM-only |       |
| PG0880, | T | common    |       |
| PG0952, | T | common    |       |
| PG0954, | T | common    |       |
| PG0959, | T | KGM-only  |       |
| PG0982, | T | KGM-only  |       |
| PG1028, | T | common    |       |
| PG1103, | T | common    |       |
| PG1130, | T | common    |       |
| PG1137, | T | KGM-only  |       |
| PG1156, | T | common    |       |
| PG1170, | T | KGM-only  |       |
| PG1171, | T | cKGM-only |       |
| PG1173, | T | common    |       |
| PG1212, | T | cKGM-only |       |
| PG1235, | T | common    | 0.604 |
| PG1241, | T | common    |       |
| PG1279, | T | common    | 1.047 |
| PG1306, | T | common    |       |
| PG1307, | T | KGM-only  |       |
| PG1327, | T | common    |       |
| PG1328, | T | common    |       |
| PG1334, | T | common    |       |
| PG1374, | T | common    | 0.761 |
| PG1385, | T | common    |       |

---

---

|         |   |           |       |
|---------|---|-----------|-------|
| PG1402, | T | common    |       |
| PG1404, | T | cKGM-only |       |
| PG1430, | T | common    |       |
| PG1514, | T | cKGM-only |       |
| PG1544, | T | common    |       |
| PG1553, | T | common    |       |
| PG1570, | T | cKGM-only |       |
| PG1571, | T | cKGM-only |       |
| PG1579, | T | cKGM-only |       |
| PG1587, | T | KGM-only  |       |
| PG1594, | T | KGM-only  |       |
| PG1613, | T | common    |       |
| PG1636, | T | common    |       |
| PG1651, | T | common    |       |
| PG1687, | T | cKGM-only |       |
| PG1693, | T | KGM-only  |       |
| PG1703, | T | KGM-only  |       |
| PG1725, | T | KGM-only  |       |
| PG1726, | T | common    |       |
| PG1727, | T | KGM-only  |       |
| PG1745, | T | common    |       |
| PG1773, | T | common    |       |
| PG1798, | T | cKGM-only |       |
| PG1834, | T | KGM-only  |       |
| PG1842, | T | cKGM-only |       |
| PG1851, | T | KGM-only  |       |
| PG1852, | T | common    |       |
| PG1864, | T | common    | *1    |
| PG1886, | T | cKGM-only |       |
| PG1947, | T | common    |       |
| PG1953, | T | common    |       |
| PG1967, | T | cKGM-only |       |
| PG1982, | T | KGM-only  |       |
| PG2047, | T | common    |       |
| PG2069, | T | common    |       |
| PG2072, | T | KGM-only  |       |
| PG2100, | T | common    |       |
| PG2102, | T | common    |       |
| PG2120, | T | KGM-only  |       |
| PG2131, | T | common    | 0.505 |
| PG2143, | T | common    |       |
| PG2157, | T | cKGM-only |       |
| PG2167, | T | common    |       |
| PG2171, | T | common    |       |

---

\*1: identified in both samples, but with significantly more total signal observed in KGM in all replicates, indicating potential upregulation under KGM conditions. An expression ratio was not calculated due to the presence of non-unique peptides and (or) an insufficient number of unique peptides.

\*2: identified in both samples, but with significantly more total signal observed in cKGM in all replicates, indicating potential upregulation under cKGM conditions. An expression ratio was not calculated due to the presence of non-unique peptides, or an insufficient number of unique peptides.

A minimum of two unique tryptic or half-tryptic peptides were required for identification. See the text for details regarding the scoring procedures.

Table S1B (supplementary material)

Detected and Differentially Expressed *P. gingivalis* Proteins Arranged by ORF Number. Note that P13793 FMA\_PORGI refers to a variant of FimA sequenced in strain ATCC 33277. The FimA sequence in 33277 and W83 differ substantially.

| ORF               | Group | Sample    | KGM/cKGM |
|-------------------|-------|-----------|----------|
| P13793 FMA_PORGI, | C     | KGM-only  |          |
| PG0003,           | C     | cKGM-only |          |
| PG0004,           | P     | common    |          |
| PG0006,           | S     | cKGM-only |          |
| PG0010,           | M     | cKGM-only |          |
| PG0011,           | C     | common    |          |
| PG0012,           | B     | common    | 0.890    |
| PG0017,           | Q     | cKGM-only |          |
| PG0018,           | K     | cKGM-only |          |
| PG0020,           | P     | KGM-only  |          |
| PG0024,           | T     | common    |          |
| PG0025,           | H     | cKGM-only |          |
| PG0026,           | K     | cKGM-only |          |
| PG0027,           | K     | KGM-only  |          |
| PG0032,           | C     | common    |          |
| PG0034,           | H     | common    | 0.391    |
| PG0035,           | F     | common    |          |
| PG0037,           | N     | common    |          |
| PG0042,           | A,E   | common    | 0.610    |
| PG0043,           | C     | common    |          |
| PG0045,           | M     | cKGM-only |          |
| PG0047,           | D     | common    |          |
| PG0048,           | J     | common    |          |
| PG0055,           | J     | KGM-only  |          |
| PG0056,           | K     | common    |          |
| PG0061,           | T     | cKGM-only |          |
| PG0062,           | T     | cKGM-only |          |
| PG0063,           | S     | KGM-only  |          |
| PG0064,           | S     | common    |          |
| PG0070,           | C     | common    |          |
| PG0071,           | C     | common    |          |
| PG0072,           | C     | KGM-only  |          |
| PG0073,           | O     | common    |          |
| PG0075,           | O     | common    |          |
| PG0076,           | C     | cKGM-only |          |
| PG0078,           | K     | KGM-only  |          |
| PG0079,           | D     | common    |          |
| PG0081,           | K     | KGM-only  |          |
| PG0082,           | K     | cKGM-only |          |



|         |     |           |       |
|---------|-----|-----------|-------|
| PG0086, | R   | cKGM-only |       |
| PG0087, | T   | KGM-only  |       |
| PG0089, | K   | KGM-only  |       |
| PG0090, | D   | common    | 1.200 |
| PG0091, | S   | cKGM-only |       |
| PG0092, | S   | common    |       |
| PG0094, | S   | cKGM-only |       |
| PG0095, | F   | common    | *2    |
| PG0097, | J   | common    |       |
| PG0098, | K   | KGM-only  |       |
| PG0099, | N   | common    |       |
| PG0109, | K   | KGM-only  |       |
| PG0110, | C   | cKGM-only |       |
| PG0112, | J   | common    |       |
| PG0117, | S   | cKGM-only |       |
| PG0118, | C   | KGM-only  |       |
| PG0119, | C   | cKGM-only |       |
| PG0120, | C   | cKGM-only |       |
| PG0121, | F   | common    | *2    |
| PG0124, | J   | cKGM-only |       |
| PG0125, | K   | cKGM-only |       |
| PG0126, | E   | cKGM-only |       |
| PG0127, | B   | cKGM-only |       |
| PG0128, | J   | cKGM-only |       |
| PG0130, | H   | common    | 0.577 |
| PG0133, | K   | KGM-only  |       |
| PG0135, | D,N | common    |       |
| PG0136, | K   | cKGM-only |       |
| PG0137, | M   | common    |       |
| PG0138, | I   | common    | 0.203 |
| PG0139, | C   | KGM-only  |       |
| PG0140, | K   | cKGM-only |       |
| PG0141, | D   | cKGM-only |       |
| PG0142, | P   | KGM-only  |       |
| PG0144, | J   | cKGM-only |       |
| PG0146, | K   | cKGM-only |       |
| PG0148, | P   | common    |       |
| PG0152, | E   | KGM-only  |       |
| PG0153, | N   | common    |       |
| PG0159, | M   | common    | 0.590 |
| PG0160, | J   | common    |       |
| PG0162, | R   | cKGM-only |       |
| PG0163, | H   | common    |       |
| PG0165, | N   | cKGM-only |       |
| PG0167, | N   | common    | 0.862 |
| PG0170, | N   | common    |       |
| PG0171, | O   | common    |       |

---

|         |   |           |       |
|---------|---|-----------|-------|
| PG0174, | J | common    |       |
| PG0178, | C | common    |       |
| PG0179, | K | common    |       |
| PG0180, | K | KGM-only  |       |
| PG0181, | T | common    | *1    |
| PG0182, | T | common    | *1    |
| PG0185, | T | common    | 0.887 |
| PG0186, | C | cKGM-only |       |
| PG0188, | K | cKGM-only |       |
| PG0189, | K | common    | *2    |
| PG0191, | C | common    |       |
| PG0192, | C | common    |       |
| PG0195, | H | common    | 0.775 |
| PG0196, | M | common    |       |
| PG0201, | R | KGM-only  |       |
| PG0202, | B | common    |       |
| PG0203, | K | KGM-only  |       |
| PG0211, | B | cKGM-only |       |
| PG0213, | B | KGM-only  |       |
| PG0215, | K | KGM-only  |       |
| PG0218, | K | KGM-only  |       |
| PG0226, | T | common    | *1    |
| PG0227, | F | KGM-only  |       |
| PG0228, | T | KGM-only  |       |
| PG0230, | H | common    | 0.821 |
| PG0232, | M | common    | 1.865 |
| PG0235, | M | common    |       |
| PG0237, | F | KGM-only  |       |
| PG0241, | K | common    |       |
| PG0242, | J | KGM-only  |       |
| PG0245, | D | common    |       |
| PG0246, | K | cKGM-only |       |
| PG0249, | H | common    | 1.083 |
| PG0254, | R | common    |       |
| PG0255, | N | common    |       |
| PG0256, | K | KGM-only  |       |
| PG0257, | J | cKGM-only |       |
| PG0258, | S | common    |       |
| PG0259, | J | common    |       |
| PG0263, | N | KGM-only  |       |
| PG0264, | C | common    |       |
| PG0267, | N | common    |       |
| PG0268, | N | cKGM-only |       |
| PG0269, | F | cKGM-only |       |
| PG0270, | P | cKGM-only |       |
| PG0272, | D | KGM-only  |       |
| PG0275, | H | common    |       |

---

---

|         |     |           |       |
|---------|-----|-----------|-------|
| PG0276, | J   | cKGM-only |       |
| PG0279, | H   | common    |       |
| PG0280, | S   | KGM-only  |       |
| PG0281, | S   | common    |       |
| PG0282, | S   | KGM-only  |       |
| PG0285, | K   | KGM-only  |       |
| PG0289, | K   | KGM-only  |       |
| PG0292, | S   | cKGM-only |       |
| PG0293, | M   | common    |       |
| PG0294, | C   | cKGM-only |       |
| PG0295, | D   | common    |       |
| PG0296, | O   | common    |       |
| PG0300, | T   | KGM-only  |       |
| PG0304, | H   | common    |       |
| PG0305, | C   | common    | *2    |
| PG0306, | J   | common    |       |
| PG0307, | H   | cKGM-only |       |
| PG0309, | B,C | common    |       |
| PG0316, | N   | common    | 1.208 |
| PG0317, | J   | common    | *2    |
| PG0319, | K   | cKGM-only |       |
| PG0320, | K   | cKGM-only |       |
| PG0321, | P,S | common    |       |
| PG0323, | J   | common    |       |
| PG0324, | H   | common    |       |
| PG0325, | J   | common    |       |
| PG0327, | K   | cKGM-only |       |
| PG0328, | H   | common    |       |
| PG0329, | H,T | common    | 0.530 |
| PG0330, | F   | common    |       |
| PG0332, | R   | common    |       |
| PG0333, | C   | KGM-only  |       |
| PG0334, | C   | common    |       |
| PG0336, | K   | KGM-only  |       |
| PG0338, | K   | common    |       |
| PG0343, | H   | common    |       |
| PG0344, | E   | KGM-only  |       |
| PG0347, | H   | KGM-only  |       |
| PG0349, | T   | KGM-only  |       |
| PG0350, | T   | cKGM-only |       |
| PG0359, | T   | KGM-only  |       |
| PG0360, | T   | common    |       |
| PG0361, | J   | KGM-only  |       |
| PG0363, | K   | common    |       |
| PG0364, | J   | cKGM-only |       |
| PG0366, | K   | common    |       |
| PG0368, | F   | common    | *2    |

---

|         |     |           |       |
|---------|-----|-----------|-------|
| PG0369, | C   | cKGM-only |       |
| PG0373, | K   | cKGM-only |       |
| PG0376, | N   | common    |       |
| PG0377, | N   | common    | 0.660 |
| PG0378, | N   | common    | 0.799 |
| PG0383, | M   | cKGM-only |       |
| PG0384, | F   | KGM-only  |       |
| PG0386, | F,N | common    |       |
| PG0387, | N   | common    | 1.191 |
| PG0389, | R   | common    |       |
| PG0390, | N   | common    |       |
| PG0391, | N   | common    |       |
| PG0392, | N   | common    | 1.092 |
| PG0393, | N   | common    | 1.024 |
| PG0394, | R   | common    | 0.864 |
| PG0395, | R   | common    |       |
| PG0396, | P   | cKGM-only |       |
| PG0398, | F   | common    |       |
| PG0401, | T   | common    |       |
| PG0409, | K   | common    |       |
| PG0410, | K   | cKGM-only |       |
| PG0411, | D   | common    |       |
| PG0415, | M   | common    |       |
| PG0416, | F   | common    |       |
| PG0417, | M   | cKGM-only |       |
| PG0418, | M   | cKGM-only |       |
| PG0423, | K   | common    |       |
| PG0429, | H   | common    |       |
| PG0430, | T   | common    | 1.157 |
| PG0432, | T   | KGM-only  |       |
| PG0433, | T   | common    |       |
| PG0434, | K   | cKGM-only |       |
| PG0436, | S   | KGM-only  |       |
| PG0438, | K   | KGM-only  |       |
| PG0443, | T   | common    |       |
| PG0445, | M   | common    |       |
| PG0446, | B   | KGM-only  |       |
| PG0447, | J   | common    |       |
| PG0448, | K   | common    | *1    |
| PG0449, | T   | common    |       |
| PG0452, | K   | common    |       |
| PG0453, | J   | KGM-only  |       |
| PG0456, | T   | KGM-only  |       |
| PG0461, | L   | common    |       |
| PG0462, | S   | common    |       |
| PG0464, | O   | common    |       |
| PG0467, | K   | KGM-only  |       |

---

|         |     |           |       |
|---------|-----|-----------|-------|
| PG0471, | K   | common    |       |
| PG0474, | H   | KGM-only  |       |
| PG0475, | B   | cKGM-only |       |
| PG0481, | B   | common    | 0.296 |
| PG0482, | K   | common    |       |
| PG0485, | M   | common    |       |
| PG0488, | F   | KGM-only  |       |
| PG0490, | C   | KGM-only  |       |
| PG0491, | J   | common    | 0.805 |
| PG0492, | K   | KGM-only  |       |
| PG0495, | K   | KGM-only  |       |
| PG0501, | J   | KGM-only  |       |
| PG0502, | N   | cKGM-only |       |
| PG0503, | D,M | common    | *2    |
| PG0506, | M   | common    | *1    |
| PG0512, | O   | KGM-only  |       |
| PG0514, | M   | common    |       |
| PG0516, | J   | common    |       |
| PG0517, | K   | KGM-only  |       |
| PG0520, | M   | common    | 0.990 |
| PG0521, | M   | common    | 0.570 |
| PG0522, | N   | KGM-only  |       |
| PG0525, | O   | cKGM-only |       |
| PG0526, | C   | common    |       |
| PG0529, | O   | KGM-only  |       |
| PG0530, | O   | common    |       |
| PG0531, | B   | common    |       |
| PG0532, | J   | cKGM-only |       |
| PG0534, | K   | KGM-only  |       |
| PG0535, | J   | common    |       |
| PG0537, | M   | common    | 1.101 |
| PG0538, | S   | KGM-only  |       |
| PG0540, | D,S | cKGM-only |       |
| PG0547, | J   | common    |       |
| PG0548, | H   | common    | 1.475 |
| PG0553, | M   | common    |       |
| PG0557, | K   | KGM-only  |       |
| PG0558, | O   | common    |       |
| PG0559, | E   | cKGM-only |       |
| PG0561, | M   | common    |       |
| PG0562, | S   | cKGM-only |       |
| PG0571, | A   | KGM-only  |       |
| PG0573, | J   | KGM-only  |       |
| PG0576, | C   | cKGM-only |       |
| PG0577, | C   | KGM-only  |       |
| PG0580, | C   | cKGM-only |       |
| PG0581, | C   | cKGM-only |       |

---

---

|         |   |           |       |
|---------|---|-----------|-------|
| PG0583, | D | common    |       |
| PG0584, | D | KGM-only  |       |
| PG0588, | B | cKGM-only |       |
| PG0589, | O | common    |       |
| PG0592, | N | common    |       |
| PG0595, | N | common    |       |
| PG0596, | N | common    |       |
| PG0597, | N | common    | 1.092 |
| PG0599, | B | common    |       |
| PG0602, | K | KGM-only  |       |
| PG0603, | O | common    |       |
| PG0605, | K | KGM-only  |       |
| PG0611, | K | KGM-only  |       |
| PG0613, | K | common    |       |
| PG0615, | T | common    |       |
| PG0616, | H | common    | 0.546 |
| PG0618, | D | common    |       |
| PG0620, | M | common    |       |
| PG0621, | J | KGM-only  |       |
| PG0622, | K | common    | *1    |
| PG0623, | H | common    |       |
| PG0625, | B | cKGM-only |       |
| PG0626, | K | KGM-only  |       |
| PG0629, | J | cKGM-only |       |
| PG0630, | B | common    |       |
| PG0631, | S | common    |       |
| PG0632, | S | KGM-only  |       |
| PG0634, | T | common    |       |
| PG0636, | S | common    |       |
| PG0637, | B | cKGM-only |       |
| PG0639, | M | cKGM-only |       |
| PG0644, | S | common    |       |
| PG0645, | J | cKGM-only |       |
| PG0647, | S | common    |       |
| PG0652, | K | common    |       |
| PG0653, | A | common    |       |
| PG0654, | K | KGM-only  |       |
| PG0659, | J | KGM-only  |       |
| PG0660, | T | KGM-only  |       |
| PG0665, | H | common    |       |
| PG0668, | S | common    |       |
| PG0669, | S | cKGM-only |       |
| PG0670, | J | cKGM-only |       |
| PG0671, | S | cKGM-only |       |
| PG0674, | H | common    |       |
| PG0675, | H | common    |       |
| PG0676, | T | common    |       |

---

|         |     |           |       |
|---------|-----|-----------|-------|
| PG0677, | J   | common    | *2    |
| PG0679, | S   | KGM-only  |       |
| PG0680, | J   | cKGM-only |       |
| PG0682, | S   | KGM-only  |       |
| PG0683, | S   | common    | *2    |
| PG0684, | S   | KGM-only  |       |
| PG0686, | J   | common    |       |
| PG0687, | H   | common    | 1.165 |
| PG0689, | H   | common    |       |
| PG0690, | H   | common    |       |
| PG0692, | H   | common    | 1.039 |
| PG0694, | T   | common    | 1.561 |
| PG0695, | T   | common    | 0.499 |
| PG0698, | K   | KGM-only  |       |
| PG0699, | H   | common    |       |
| PG0705, | C   | common    |       |
| PG0707, | S   | common    | 0.638 |
| PG0708, | M   | cKGM-only |       |
| PG0710, | M   | KGM-only  |       |
| PG0714, | S   | common    |       |
| PG0715, | S   | KGM-only  |       |
| PG0718, | J   | KGM-only  |       |
| PG0719, | Q   | cKGM-only |       |
| PG0720, | P,Q | cKGM-only |       |
| PG0724, | M   | common    |       |
| PG0725, | T   | common    |       |
| PG0726, | K   | common    |       |
| PG0729, | C   | cKGM-only |       |
| PG0733, | B   | common    |       |
| PG0742, | T   | common    | *1    |
| PG0744, | N   | cKGM-only |       |
| PG0745, | H   | cKGM-only |       |
| PG0747, | P,Q | cKGM-only |       |
| PG0750, | C   | cKGM-only |       |
| PG0751, | T   | KGM-only  |       |
| PG0753, | M   | common    | *1    |
| PG0754, | F   | cKGM-only |       |
| PG0755, | N   | cKGM-only |       |
| PG0757, | K   | common    |       |
| PG0758, | M   | common    |       |
| PG0759, | T   | KGM-only  |       |
| PG0762, | M   | common    |       |
| PG0766, | R   | common    | 0.729 |
| PG0769, | T   | KGM-only  |       |
| PG0774, | K   | KGM-only  |       |
| PG0775, | I   | common    | 1.002 |
| PG0776, | H   | common    |       |

---

|         |   |           |       |
|---------|---|-----------|-------|
| PG0777, | H | common    |       |
| PG0778, | J | cKGM-only |       |
| PG0779, | K | KGM-only  |       |
| PG0780, | K | common    |       |
| PG0781, | K | common    | *2    |
| PG0782, | S | common    | 0.955 |
| PG0784, | E | common    |       |
| PG0785, | S | cKGM-only |       |
| PG0787, | K | cKGM-only |       |
| PG0791, | O | common    |       |
| PG0793, | H | common    |       |
| PG0794, | C | cKGM-only |       |
| PG0796, | N | common    |       |
| PG0800, | J | common    | *2    |
| PG0802, | H | common    |       |
| PG0803, | E | cKGM-only |       |
| PG0804, | H | common    |       |
| PG0805, | M | common    |       |
| PG0809, | K | KGM-only  |       |
| PG0832, | K | cKGM-only |       |
| PG0834, | K | cKGM-only |       |
| PG0838, | L | KGM-only  |       |
| PG0840, | K | common    |       |
| PG0841, | L | KGM-only  |       |
| PG0842, | L | KGM-only  |       |
| PG0843, | K | common    |       |
| PG0844, | K | KGM-only  |       |
| PG0847, | J | KGM-only  |       |
| PG0854, | K | cKGM-only |       |
| PG0856, | K | common    |       |
| PG0861, | T | cKGM-only |       |
| PG0864, | F | cKGM-only |       |
| PG0866, | K | cKGM-only |       |
| PG0871, | K | common    |       |
| PG0874, | L | cKGM-only |       |
| PG0877, | K | KGM-only  |       |
| PG0880, | T | common    |       |
| PG0881, | F | common    |       |
| PG0884, | K | KGM-only  |       |
| PG0889, | M | KGM-only  |       |
| PG0890, | E | cKGM-only |       |
| PG0895, | K | common    |       |
| PG0906, | C | common    |       |
| PG0908, | F | common    |       |
| PG0909, | J | cKGM-only |       |
| PG0913, | K | cKGM-only |       |
| PG0914, | K | KGM-only  |       |

---



---

|         |   |           |       |
|---------|---|-----------|-------|
| PG0918, | K | KGM-only  |       |
| PG0919, | O | cKGM-only |       |
| PG0920, | C | KGM-only  |       |
| PG0922, | C | KGM-only  |       |
| PG0923, | R | KGM-only  |       |
| PG0928, | Q | common    | *1    |
| PG0931, | K | KGM-only  |       |
| PG0933, | N | common    | *2    |
| PG0938, | S | common    |       |
| PG0945, | S | KGM-only  |       |
| PG0946, | S | cKGM-only |       |
| PG0950, | H | common    | *2    |
| PG0951, | O | cKGM-only |       |
| PG0952, | T | common    |       |
| PG0954, | T | common    |       |
| PG0957, | B | KGM-only  |       |
| PG0959, | T | KGM-only  |       |
| PG0962, | N | common    |       |
| PG0969, | N | KGM-only  |       |
| PG0972, | J | KGM-only  |       |
| PG0976, | O | common    |       |
| PG0977, | B | KGM-only  |       |
| PG0978, | A | KGM-only  |       |
| PG0980, | K | cKGM-only |       |
| PG0982, | T | KGM-only  |       |
| PG0987, | K | KGM-only  |       |
| PG0989, | N | common    |       |
| PG0992, | N | common    | 0.759 |
| PG1004, | M | common    |       |
| PG1006, | K | common    |       |
| PG1007, | P | KGM-only  |       |
| PG1013, | E | common    | 0.698 |
| PG1017, | H | common    | 1.245 |
| PG1020, | K | KGM-only  |       |
| PG1022, | K | common    |       |
| PG1023, | B | cKGM-only |       |
| PG1026, | K | cKGM-only |       |
| PG1028, | T | common    |       |
| PG1035, | K | common    |       |
| PG1036, | F | common    |       |
| PG1037, | K | common    | 0.691 |
| PG1038, | F | common    |       |
| PG1039, | C | KGM-only  |       |
| PG1042, | H | cKGM-only |       |
| PG1043, | S | KGM-only  |       |
| PG1048, | C | common    |       |
| PG1049, | J | KGM-only  |       |

---

---

|         |     |           |       |
|---------|-----|-----------|-------|
| PG1051, | K   | KGM-only  |       |
| PG1053, | P   | common    |       |
| PG1055, | M   | KGM-only  |       |
| PG1060, | M   | KGM-only  |       |
| PG1066, | H   | common    |       |
| PG1067, | K   | KGM-only  |       |
| PG1068, | J   | common    | 0.538 |
| PG1069, | H   | common    | 1.062 |
| PG1070, | H   | common    |       |
| PG1071, | K   | common    |       |
| PG1073, | H   | KGM-only  |       |
| PG1074, | H   | KGM-only  |       |
| PG1076, | I   | common    | 1.312 |
| PG1077, | H   | common    |       |
| PG1078, | H   | common    | 0.754 |
| PG1079, | I   | KGM-only  |       |
| PG1080, | I   | common    | *2    |
| PG1081, | H   | common    |       |
| PG1082, | H   | common    | 0.564 |
| PG1084, | H   | common    | 1.457 |
| PG1085, | K   | common    |       |
| PG1087, | J   | cKGM-only |       |
| PG1093, | K   | common    |       |
| PG1094, | C,H | common    | *2    |
| PG1095, | N   | common    |       |
| PG1096, | K   | common    | *1    |
| PG1100, | K   | KGM-only  |       |
| PG1101, | S   | common    | *2    |
| PG1102, | K   | KGM-only  |       |
| PG1103, | T   | common    |       |
| PG1105, | R   | cKGM-only |       |
| PG1107, | K   | KGM-only  |       |
| PG1111, | J   | cKGM-only |       |
| PG1114, | B   | common    |       |
| PG1115, | M   | common    |       |
| PG1116, | B   | common    | 0.287 |
| PG1118, | M   | common    | 0.982 |
| PG1121, | N   | common    | 0.599 |
| PG1122, | N   | cKGM-only |       |
| PG1123, | O   | common    |       |
| PG1126, | S   | cKGM-only |       |
| PG1127, | P   | KGM-only  |       |
| PG1128, | F   | KGM-only  |       |
| PG1129, | O   | common    | 0.980 |
| PG1130, | T   | common    |       |
| PG1132, | N   | common    |       |
| PG1134, | H   | common    |       |

---

---

|         |   |           |       |
|---------|---|-----------|-------|
| PG1135, | C | common    |       |
| PG1137, | T | KGM-only  |       |
| PG1140, | C | cKGM-only |       |
| PG1143, | C | common    | *1    |
| PG1146, | K | common    |       |
| PG1151, | H | common    |       |
| PG1156, | T | common    |       |
| PG1159, | B | common    | *2    |
| PG1163, | B | KGM-only  |       |
| PG1164, | K | cKGM-only |       |
| PG1170, | T | KGM-only  |       |
| PG1171, | T | cKGM-only |       |
| PG1172, | H | common    |       |
| PG1173, | T | common    |       |
| PG1175, | S | cKGM-only |       |
| PG1176, | S | common    | *2    |
| PG1179, | J | KGM-only  |       |
| PG1180, | C | KGM-only  |       |
| PG1184, | C | cKGM-only |       |
| PG1185, | K | KGM-only  |       |
| PG1186, | K | KGM-only  |       |
| PG1189, | K | common    |       |
| PG1192, | K | cKGM-only |       |
| PG1195, | B | cKGM-only |       |
| PG1199, | K | cKGM-only |       |
| PG1202, | K | common    |       |
| PG1208, | M | common    |       |
| PG1209, | K | common    |       |
| PG1210, | M | common    | 0.826 |
| PG1212, | T | cKGM-only |       |
| PG1218, | K | KGM-only  |       |
| PG1219, | K | common    |       |
| PG1225, | S | common    |       |
| PG1232, | H | common    | 0.650 |
| PG1235, | T | common    | 0.604 |
| PG1237, | P | cKGM-only |       |
| PG1238, | N | cKGM-only |       |
| PG1239, | I | common    |       |
| PG1241, | T | common    |       |
| PG1242, | F | KGM-only  |       |
| PG1246, | N | common    | 2.431 |
| PG1247, | A | KGM-only  |       |
| PG1248, | J | common    |       |
| PG1249, | I | cKGM-only |       |
| PG1252, | C | KGM-only  |       |
| PG1253, | F | cKGM-only |       |
| PG1256, | R | cKGM-only |       |

---

|         |     |           |       |
|---------|-----|-----------|-------|
| PG1258, | F   | cKGM-only |       |
| PG1260, | O   | common    | 1.037 |
| PG1269, | H   | common    |       |
| PG1270, | J   | common    |       |
| PG1271, | A   | common    | 0.711 |
| PG1274, | N   | KGM-only  |       |
| PG1277, | C   | common    |       |
| PG1278, | A,B | common    |       |
| PG1279, | T   | common    | 1.047 |
| PG1280, | J   | common    | 0.857 |
| PG1281, | K   | cKGM-only |       |
| PG1283, | J   | common    | 0.974 |
| PG1285, | E   | cKGM-only |       |
| PG1286, | S   | common    | 0.497 |
| PG1288, | C   | KGM-only  |       |
| PG1289, | C   | common    |       |
| PG1290, | A   | common    | 0.910 |
| PG1294, | S   | common    | *1    |
| PG1297, | N   | common    | 0.542 |
| PG1302, | K   | common    |       |
| PG1305, | H   | common    | 0.970 |
| PG1306, | T   | common    |       |
| PG1307, | T   | KGM-only  |       |
| PG1308, | K   | common    |       |
| PG1311, | J   | KGM-only  |       |
| PG1313, | J   | KGM-only  |       |
| PG1314, | A   | common    |       |
| PG1315, | M   | common    |       |
| PG1316, | K   | KGM-only  |       |
| PG1317, | K   | KGM-only  |       |
| PG1321, | E   | common    |       |
| PG1323, | D,T | common    |       |
| PG1326, | D   | KGM-only  |       |
| PG1327, | T   | common    |       |
| PG1328, | T   | common    |       |
| PG1330, | D   | cKGM-only |       |
| PG1331, | H   | common    | 0.847 |
| PG1332, | H   | common    | *1    |
| PG1334, | T   | common    |       |
| PG1335, | C   | KGM-only  |       |
| PG1338, | F   | KGM-only  |       |
| PG1340, | S   | KGM-only  |       |
| PG1341, | K   | common    |       |
| PG1342, | C   | KGM-only  |       |
| PG1343, | M   | KGM-only  |       |
| PG1351, | K   | KGM-only  |       |
| PG1353, | O   | common    | 0.633 |

---

|         |   |           |       |
|---------|---|-----------|-------|
| PG1356, | K | common    | 0.701 |
| PG1360, | O | common    |       |
| PG1361, | M | common    |       |
| PG1362, | J | common    | *2    |
| PG1363, | J | cKGM-only |       |
| PG1364, | B | cKGM-only |       |
| PG1365, | R | KGM-only  |       |
| PG1366, | C | common    |       |
| PG1367, | K | cKGM-only |       |
| PG1368, | H | common    |       |
| PG1369, | H | KGM-only  |       |
| PG1370, | N | common    |       |
| PG1374, | T | common    | 0.761 |
| PG1379, | S | KGM-only  |       |
| PG1381, | S | KGM-only  |       |
| PG1382, | K | KGM-only  |       |
| PG1385, | T | common    |       |
| PG1386, | F | common    |       |
| PG1389, | F | common    |       |
| PG1393, | C | KGM-only  |       |
| PG1394, | K | cKGM-only |       |
| PG1396, | C | cKGM-only |       |
| PG1401, | H | common    |       |
| PG1402, | T | common    |       |
| PG1404, | T | cKGM-only |       |
| PG1405, | K | KGM-only  |       |
| PG1407, | D | KGM-only  |       |
| PG1408, | S | KGM-only  |       |
| PG1409, | K | KGM-only  |       |
| PG1410, | K | cKGM-only |       |
| PG1411, | S | common    |       |
| PG1414, | K | common    | *2    |
| PG1416, | I | common    |       |
| PG1417, | H | common    |       |
| PG1418, | F | common    |       |
| PG1421, | H | KGM-only  |       |
| PG1422, | C | KGM-only  |       |
| PG1424, | D | common    | 0.738 |
| PG1427, | M | KGM-only  |       |
| PG1430, | T | common    |       |
| PG1432, | Q | cKGM-only |       |
| PG1434, | B | common    |       |
| PG1439, | K | common    |       |
| PG1440, | K | cKGM-only |       |
| PG1469, | F | common    |       |
| PG1471, | J | cKGM-only |       |
| PG1476, | L | KGM-only  |       |

---

---

|         |     |           |    |
|---------|-----|-----------|----|
| PG1478, | L   | common    | *1 |
| PG1479, | L   | common    |    |
| PG1486, | L   | cKGM-only |    |
| PG1489, | J   | KGM-only  |    |
| PG1490, | L   | KGM-only  |    |
| PG1492, | K   | KGM-only  |    |
| PG1493, | K   | common    |    |
| PG1495, | F   | cKGM-only |    |
| PG1499, | K   | KGM-only  |    |
| PG1505, | J   | cKGM-only |    |
| PG1514, | T   | cKGM-only |    |
| PG1519, | K   | KGM-only  |    |
| PG1528, | J   | KGM-only  |    |
| PG1529, | K   | common    |    |
| PG1530, | J   | KGM-only  |    |
| PG1531, | G,L | cKGM-only |    |
| PG1533, | F   | common    |    |
| PG1536, | D   | KGM-only  |    |
| PG1540, | N   | cKGM-only |    |
| PG1541, | B   | cKGM-only |    |
| PG1542, | M   | KGM-only  |    |
| PG1544, | T   | common    |    |
| PG1545, | D   | common    |    |
| PG1548, | M   | KGM-only  |    |
| PG1551, | S   | common    | *2 |
| PG1552, | S   | KGM-only  |    |
| PG1553, | T   | common    |    |
| PG1554, | K   | KGM-only  |    |
| PG1559, | H   | common    |    |
| PG1563, | C   | KGM-only  |    |
| PG1565, | C   | KGM-only  |    |
| PG1566, | N   | common    |    |
| PG1570, | T   | cKGM-only |    |
| PG1571, | T   | cKGM-only |    |
| PG1572, | C   | KGM-only  |    |
| PG1576, | B   | common    |    |
| PG1577, | B   | cKGM-only |    |
| PG1578, | B   | common    |    |
| PG1579, | T   | cKGM-only |    |
| PG1581, | K   | KGM-only  |    |
| PG1582, | D   | cKGM-only |    |
| PG1583, | D   | cKGM-only |    |
| PG1586, | D   | KGM-only  |    |
| PG1587, | T   | KGM-only  |    |
| PG1588, | J   | common    |    |
| PG1591, | J   | common    |    |
| PG1592, | H,J | cKGM-only |    |

---

---

|         |   |           |       |
|---------|---|-----------|-------|
| PG1594, | T | KGM-only  |       |
| PG1596, | N | common    |       |
| PG1598, | M | KGM-only  |       |
| PG1599, | K | cKGM-only |       |
| PG1601, | M | KGM-only  |       |
| PG1605, | M | common    | *2    |
| PG1606, | S | KGM-only  |       |
| PG1608, | H | KGM-only  |       |
| PG1609, | H | common    |       |
| PG1611, | K | common    |       |
| PG1612, | H | common    |       |
| PG1613, | T | common    |       |
| PG1615, | H | common    |       |
| PG1618, | J | cKGM-only |       |
| PG1621, | K | cKGM-only |       |
| PG1622, | F | common    |       |
| PG1623, | P | cKGM-only |       |
| PG1626, | K | KGM-only  |       |
| PG1633, | H | common    |       |
| PG1636, | T | common    |       |
| PG1641, | P | common    |       |
| PG1642, | S | KGM-only  |       |
| PG1648, | D | cKGM-only |       |
| PG1651, | T | common    |       |
| PG1652, | K | common    |       |
| PG1653, | J | common    |       |
| PG1656, | H | common    | *2    |
| PG1657, | H | common    |       |
| PG1675, | K | common    | *2    |
| PG1676, | H | common    | 0.944 |
| PG1677, | H | common    | 0.565 |
| PG1679, | K | KGM-only  |       |
| PG1682, | C | KGM-only  |       |
| PG1683, | J | cKGM-only |       |
| PG1687, | T | cKGM-only |       |
| PG1688, | R | common    | *1    |
| PG1693, | T | KGM-only  |       |
| PG1697, | F | cKGM-only |       |
| PG1701, | M | cKGM-only |       |
| PG1702, | F | common    |       |
| PG1703, | T | KGM-only  |       |
| PG1704, | M | common    |       |
| PG1711, | C | cKGM-only |       |
| PG1712, | C | common    |       |
| PG1715, | K | common    |       |
| PG1719, | S | cKGM-only |       |
| PG1720, | J | common    |       |

---

---

|         |     |           |       |
|---------|-----|-----------|-------|
| PG1725, | T   | KGM-only  |       |
| PG1726, | T   | common    |       |
| PG1727, | T   | KGM-only  |       |
| PG1729, | D   | common    |       |
| PG1734, | S   | KGM-only  |       |
| PG1739, | J   | common    |       |
| PG1741, | H   | common    |       |
| PG1743, | C   | common    |       |
| PG1745, | T   | common    |       |
| PG1748, | H   | common    | *2    |
| PG1754, | J   | common    |       |
| PG1755, | H   | common    | 1.162 |
| PG1758, | N   | common    | *1    |
| PG1759, | C,D | cKGM-only |       |
| PG1760, | S   | cKGM-only |       |
| PG1762, | M   | common    | 0.910 |
| PG1764, | I   | common    |       |
| PG1765, | I   | common    |       |
| PG1766, | O   | common    |       |
| PG1768, | S   | KGM-only  |       |
| PG1771, | N   | KGM-only  |       |
| PG1772, | F   | KGM-only  |       |
| PG1773, | T   | common    |       |
| PG1774, | F   | common    |       |
| PG1775, | M   | cKGM-only |       |
| PG1776, | M   | KGM-only  |       |
| PG1778, | J   | KGM-only  |       |
| PG1780, | B   | common    |       |
| PG1781, | O   | cKGM-only |       |
| PG1782, | K   | KGM-only  |       |
| PG1786, | K   | KGM-only  |       |
| PG1788, | M   | common    | 0.938 |
| PG1789, | M   | KGM-only  |       |
| PG1790, | K   | cKGM-only |       |
| PG1792, | S   | common    |       |
| PG1793, | H   | common    |       |
| PG1794, | F   | cKGM-only |       |
| PG1795, | K   | cKGM-only |       |
| PG1797, | P,Q | KGM-only  |       |
| PG1798, | T   | cKGM-only |       |
| PG1801, | H,S | cKGM-only |       |
| PG1802, | K   | cKGM-only |       |
| PG1803, | H,S | common    |       |
| PG1804, | H,S | common    | 0.463 |
| PG1805, | H,S | cKGM-only |       |
| PG1806, | H,S | common    | *1    |
| PG1808, | D   | KGM-only  |       |

---



|         |     |           |       |
|---------|-----|-----------|-------|
| PG1809, | H   | common    |       |
| PG1810, | H   | common    | 0.498 |
| PG1812, | H   | common    | 0.828 |
| PG1813, | H   | common    |       |
| PG1814, | F   | common    |       |
| PG1815, | C   | cKGM-only |       |
| PG1816, | E   | common    | 0.802 |
| PG1819, | K   | KGM-only  |       |
| PG1823, | K   | KGM-only  |       |
| PG1824, | H   | common    |       |
| PG1831, | F   | KGM-only  |       |
| PG1834, | T   | KGM-only  |       |
| PG1835, | K   | common    |       |
| PG1836, | S   | KGM-only  |       |
| PG1842, | T   | cKGM-only |       |
| PG1844, | D,M | common    |       |
| PG1847, | R   | common    | *2    |
| PG1848, | N   | common    |       |
| PG1849, | F   | common    |       |
| PG1850, | K   | cKGM-only |       |
| PG1851, | T   | KGM-only  |       |
| PG1852, | T   | common    |       |
| PG1853, | F   | common    | 0.918 |
| PG1858, | H   | cKGM-only |       |
| PG1860, | J   | common    | *1    |
| PG1864, | T   | common    | *1    |
| PG1871, | K   | KGM-only  |       |
| PG1872, | H   | common    | 1.286 |
| PG1876, | J   | common    |       |
| PG1878, | N   | cKGM-only |       |
| PG1880, | C   | KGM-only  |       |
| PG1881, | K   | cKGM-only |       |
| PG1884, | C   | KGM-only  |       |
| PG1885, | E   | common    |       |
| PG1886, | T   | cKGM-only |       |
| PG1891, | K   | KGM-only  |       |
| PG1896, | E   | common    |       |
| PG1899, | S   | cKGM-only |       |
| PG1901, | N   | common    |       |
| PG1903, | J   | common    |       |
| PG1911, | R   | common    |       |
| PG1912, | N   | common    |       |
| PG1913, | N   | common    |       |
| PG1917, | M   | cKGM-only |       |
| PG1918, | M   | common    |       |
| PG1919, | N   | KGM-only  |       |
| PG1920, | N   | cKGM-only |       |

---

|         |     |           |       |
|---------|-----|-----------|-------|
| PG1921, | N   | common    |       |
| PG1922, | N   | common    |       |
| PG1923, | N   | common    |       |
| PG1925, | N   | KGM-only  |       |
| PG1926, | N   | common    | 0.845 |
| PG1927, | N   | common    |       |
| PG1928, | N   | common    |       |
| PG1930, | N   | KGM-only  |       |
| PG1931, | N   | KGM-only  |       |
| PG1932, | N   | common    |       |
| PG1933, | N   | common    |       |
| PG1934, | N   | KGM-only  |       |
| PG1935, | N   | common    |       |
| PG1936, | N   | common    |       |
| PG1937, | N   | common    |       |
| PG1938, | N   | common    |       |
| PG1939, | N   | common    |       |
| PG1940, | N   | common    | 1.296 |
| PG1941, | N   | common    |       |
| PG1942, | N   | KGM-only  |       |
| PG1947, | T   | common    |       |
| PG1948, | K   | common    |       |
| PG1949, | H   | common    | 0.938 |
| PG1950, | C   | cKGM-only |       |
| PG1951, | N   | common    |       |
| PG1953, | T   | common    |       |
| PG1954, | C,T | common    |       |
| PG1956, | H   | common    |       |
| PG1964, | C   | common    |       |
| PG1965, | S   | common    |       |
| PG1967, | T   | cKGM-only |       |
| PG1974, | K   | cKGM-only |       |
| PG1982, | T   | KGM-only  |       |
| PG1986, | K   | cKGM-only |       |
| PG1987, | K   | common    |       |
| PG1988, | K   | cKGM-only |       |
| PG1993, | F   | cKGM-only |       |
| PG1994, | J   | KGM-only  |       |
| PG1996, | H,O | common    |       |
| PG1998, | B,E | KGM-only  |       |
| PG2000, | M   | KGM-only  |       |
| PG2001, | M   | cKGM-only |       |
| PG2003, | O   | KGM-only  |       |
| PG2004, | J   | KGM-only  |       |
| PG2006, | K   | KGM-only  |       |
| PG2010, | C,H | common    |       |
| PG2014, | J   | cKGM-only |       |

---

---

|         |     |           |       |
|---------|-----|-----------|-------|
| PG2016, | R   | cKGM-only |       |
| PG2017, | K   | KGM-only  |       |
| PG2019, | K   | KGM-only  |       |
| PG2020, | K   | common    |       |
| PG2021, | J   | common    |       |
| PG2022, | K   | cKGM-only |       |
| PG2023, | N   | cKGM-only |       |
| PG2024, | D,M | common    | 0.654 |
| PG2029, | K   | common    | 2.120 |
| PG2038, | C   | KGM-only  |       |
| PG2040, | K   | KGM-only  |       |
| PG2042, | H   | common    | *1    |
| PG2043, | J   | common    |       |
| PG2044, | J   | common    | *1    |
| PG2047, | T   | common    |       |
| PG2049, | K   | KGM-only  |       |
| PG2050, | K   | common    |       |
| PG2054, | C   | common    |       |
| PG2055, | O   | common    |       |
| PG2060, | O   | common    |       |
| PG2062, | N   | cKGM-only |       |
| PG2063, | K   | common    |       |
| PG2064, | K   | cKGM-only |       |
| PG2066, | K   | common    |       |
| PG2067, | B   | KGM-only  |       |
| PG2068, | C   | cKGM-only |       |
| PG2069, | T   | common    |       |
| PG2072, | T   | KGM-only  |       |
| PG2078, | J   | cKGM-only |       |
| PG2083, | K   | cKGM-only |       |
| PG2085, | N   | cKGM-only |       |
| PG2086, | K   | common    |       |
| PG2089, | K   | cKGM-only |       |
| PG2090, | S   | cKGM-only |       |
| PG2092, | K   | common    |       |
| PG2094, | J   | common    | *1    |
| PG2097, | O   | common    |       |
| PG2100, | T   | common    |       |
| PG2102, | T   | common    |       |
| PG2105, | K   | cKGM-only |       |
| PG2106, | K   | common    |       |
| PG2108, | B   | KGM-only  |       |
| PG2109, | B   | cKGM-only |       |
| PG2117, | N   | cKGM-only |       |
| PG2119, | C,T | cKGM-only |       |
| PG2120, | T   | KGM-only  |       |
| PG2121, | H   | KGM-only  |       |

---

|         |   |           |       |
|---------|---|-----------|-------|
| PG2124, | H | common    | 1.415 |
| PG2125, | P | KGM-only  |       |
| PG2126, | J | cKGM-only |       |
| PG2131, | T | common    | 0.505 |
| PG2132, | C | KGM-only  |       |
| PG2133, | C | cKGM-only |       |
| PG2136, | K | cKGM-only |       |
| PG2141, | I | common    |       |
| PG2143, | T | common    |       |
| PG2144, | K | common    |       |
| PG2149, | K | common    |       |
| PG2155, | K | common    |       |
| PG2157, | T | cKGM-only |       |
| PG2158, | J | cKGM-only |       |
| PG2159, | B | KGM-only  |       |
| PG2161, | P | KGM-only  |       |
| PG2162, | C | common    |       |
| PG2163, | D | KGM-only  |       |
| PG2165, | N | cKGM-only |       |
| PG2167, | T | common    |       |
| PG2171, | T | common    |       |
| PG2172, | K | cKGM-only |       |
| PG2173, | C | cKGM-only |       |
| PG2174, | K | common    |       |
| PG2177, | H | KGM-only  |       |
| PG2181, | H | common    |       |
| PG2182, | H | common    |       |
| PG2187, | B | KGM-only  |       |
| PG2188, | A | common    | *2    |
| PG2197, | J | cKGM-only |       |
| PG2201, | M | KGM-only  |       |
| PG2204, | K | common    |       |
| PG2205, | B | common    |       |
| PG2206, | S | cKGM-only |       |
| PG2207, | J | common    | 1.114 |
| PG2208, | K | KGM-only  |       |
| PG2209, | J | cKGM-only |       |
| PG2210, | F | common    |       |
| PG2212, | K | KGM-only  |       |
| PG2215, | C | common    | *1    |
| PG2216, | K | KGM-only  |       |
| PG2217, | B | common    |       |
| PG2221, | J | KGM-only  |       |
| PG2223, | C | KGM-only  |       |
| PG2227, | K | KGM-only  |       |

\*1: identified in both samples, but with significantly more total signal observed in KGM in all replicates, indicating potential upregulation under KGM conditions. An expression ratio was not calculated due to the presence of non-unique peptides and (or) an insufficient number of unique peptides.

\*2: identified in both samples, but with significantly more total signal observed in cKGM in all replicates, indicating potential upregulation under cKGM conditions. An expression ratio was not calculated due to the presence of non-unique peptides, or an insufficient number of unique peptides.

A minimum of two unique tryptic or half-tryptic peptides were required for identification. See the text for details regarding the scoring procedures.

#### *P. gingivalis* Protein Functional Classes (TIGR Definition) and Symbols

| Functional Class                                           | Symbol |
|------------------------------------------------------------|--------|
| amino acid biosynthesis                                    | A      |
| biosynthesis of cofactors, prosthetic groups, and carriers | B      |
| cell envelope                                              | C      |
| cellular processes                                         | D      |
| central intermediary metabolism                            | E      |
| DNA metabolism                                             | F      |
| disrupted reading frame                                    | G      |
| energy metabolism                                          | H      |
| fatty acid and phospholipid metabolism                     | I      |
| hypothetical proteins-conserved                            | J      |
| hypothetical proteins                                      | K      |
| other categories                                           | L      |
| protein fate                                               | M      |
| protein synthesis                                          | N      |
| purines, pyrimidines, nucleosides and nucleotides          | O      |
| regulatory functions                                       | P      |
| signal transduction                                        | Q      |
| transcription                                              | R      |
| transport and binding proteins                             | S      |
| unknown function                                           | T      |

Table S2 (supplementary material).

*P. gingivalis* ORFs discarded<sup>1</sup> during quantitative calculations and excluded from the functional class listing in Table 1.

PG0051  
PG0184  
PG0460  
PG0549  
PG0568  
PG0760  
PG0764  
PG0813  
PG0823  
PG0825  
PG0827  
PG0845  
PG0852  
PG0944  
PG1031  
PG1177  
PG1197  
PG1228  
PG1244  
PG1320  
PG1349  
PG1384  
PG1399  
PG1446  
PG1448  
PG1450  
PG1624  
PG1837  
PG1845  
PG1906  
PG1909  
PG1972  
PG1975  
PG2011  
PG2059  
PG2169  
PG2193

<sup>1</sup> These ORFs were excluded because unique peptides could not be isolated (see text).

**Supplementary Figure S1.** Frequency distribution histogram of the 89  $\log_2$  transformed expression ratios given in Table S1. The bin size was 0.2  $\log_2$  units. Although some tailing was observed at both ends, the observed distribution was approximately lognormal about a mean of 0, suggesting that the ratios were behaving as expected for KGM and cKGM samples generating about the same overall amount of protein, see the method of MacCoss *et al.* [38], *Anal. Chem.* 2003, 75, 6912-6921. and the discussion of microarray normalization methods in [39], Knudsen, S., *Guide to Analysis of DNA Microarray Data*, 2<sup>nd</sup> Ed. Because of the favorable ratio distribution about zero and the approximately equal signal intensities observed under both growth conditions, we chose not to normalize or otherwise add corrections to the ratios given in Table S1.

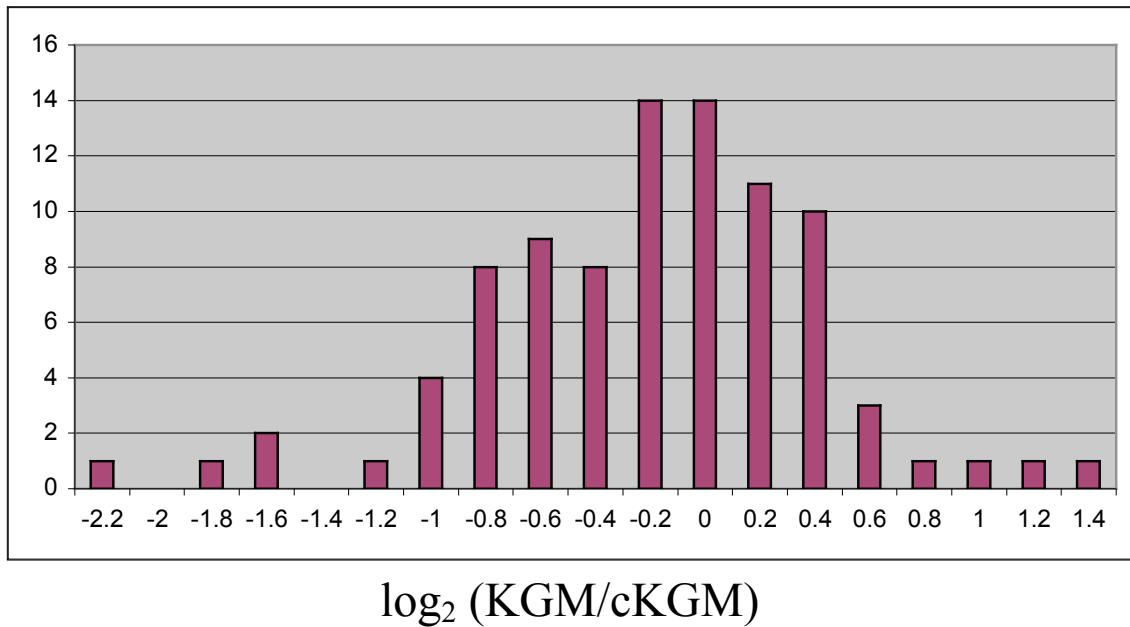

## **Derivation of a simplified estimate of the reduction in random Type I error as a result of our approach to database searching with SEQUEST**

A rough estimate of the reduction in purely random Type 1 error (false positive error) with respect to the qualitative identification of proteins based on a single peptide match was given in the main text as about a factor of 50, based on an earlier estimate for fully tryptic cleavages proposed by Michael MacCoss at the University of Washington Department of Genome Sciences. This estimate was used in part to justify our use of “no enzyme specificity” in our searches and rejection of protein identifications based on a single peptide, although other lines of argument could be used towards the same ends. First, let us assume  $Z$  = any amino acid except R or K, all proteins are assumed to consist of the 20 common amino acids, there are no modifications, amino acid frequency of occurrence and distribution throughout the proteome is random, all reported proteolytic cleavages are fully tryptic or half tryptic, including K.P and R.P, which in fact are not cleaved efficiently in reality. Next, consider that every peptide is preceded and ends in one of the 20 common amino acids, thus there are  $20^2 = 400$  possible combinations of amino acids that can be found before the peptide and at the N-terminus. Of these only 8 combinations can be fully tryptic or half tryptic (i.e. R.ZZZR., K.ZZZK., R.ZZZK., K.ZZZR, R.ZZZZ, K.ZZZZ., Z.ZZZK., Z.ZZZR). By this reasoning about 2% of the random false positives will be fully tryptic or half tryptic peptide. If two unique peptide hits are required for identification, then the predicted random false positives would be  $[1/50]^2$ , or about 1/2500. Although the simplifying assumptions are clearly not valid in practice, nonetheless such a calculation has utility in that it suggests the basis for our decision to conduct our SEQUEST computations without enzyme specificity, subsequently filtering out the non-tryptic fragments using the adjustable criteria available in DTASelect (see reference [21] in the main text). Our purpose is to minimize random false positives, while not making a bad situation worse with respect to false negative error (see the main text discussion of Type II error). Performing the calculations in this manner probably has a lower risk for random false positives when compared to the alternative strategies of forcing a fit to predicted tryptic or half tryptic fragments at the search engine level, or using no enzyme specificity and reporting all the results regardless of cleavage specificity.
